# Supplementary material
Source: Research Square preprint supplement (doi:10.21203/rs.3.rs-9348532/v1)
Supplement: Supplementary file 1 [file 85c67f22ee3ce78308cd5fc7.docx]

**Table 1** Composition and experimental design variables of the formulation

|  | **Independent factors** | units | **Levels** | | |
| --- | --- | --- | --- | --- | --- |
| **Low** | **Medium** | **High** |
| **A** | GMO/PL 407 ratio | w/w | -1 | 0 | +1 |
| B | Drugconcentration (DC) | mg | -1 | 0 | +1 |
| C | Homogenization pressure (HP) | MPa | -1 | 0 | **+1** |
| D | Homogenization cycles (HC) | number | -1 | 0 | **+1** |
| Responses | |  | Constraints | | |
| Y1 | PS | nm | Minimum | | |
| Y2 | PDI |  | Minimum | | |
| Y3 | EE | % | High | | |

**Table 2** Selection and justification for the various QTPPS and its CQAs

| **QTPP** | **Target** | **Justification’** |
| --- | --- | --- |
| Preparation | Cubosomes | Cubosomes help to solubilize, stabilize and as well provide a sustain release of drug |
| Delivery route | peroral | The present marketed formulation is given orally and we are targeting for the same |
| Drug release | A comparison of cubosomes with pure drug | Cubosomes can sustain the drug release at the desired site and enhance the overall bioavailability |
| kinetics | Better than the current marketed formulation | High AUC, Cmax leading to higher bioavailability |
| Stability | Optimized cubosomes need to be stable at least for 90 days | Size always plays a major role in affecting the formulation's stability and efficiency |
| **CQAs** | | |
| **CQA** | **Target** | **Justification** |
| PS | nm | Minimizing to the nanoscale size enhances the surface area, promoting disintegration and release. This gradual dissolution and will help in prolonged release |
| PDI |  | Low indicates a better homogeneity of the formulation |
| % EE | High | High EE leads to reduction in drug dose |

**Table 3** The impact of the selected variables on PS, PI, and % EE

|  | Factor 1 | Factor 2 | Factor 3 | Factor 4 | Response 1 | Response 2 | Response 3 |
| --- | --- | --- | --- | --- | --- | --- | --- |
| Run | A:GMO/PL 407 ratio | B:Drug Conc. | C:HP | D:HC | PS | PDI | EE |
|  | w/w | mg | bars | no. | nm |  | % |
| 1 | 0 | 0 | -1 | 1 | 179.1 | 0.24 | 53.23 |
| 2 | 0 | 1 | 1 | 0 | 275.9 | 0.48 | 61.88 |
| 3 | 1 | 0 | -1 | 0 | 176.8 | 0.348 | 69.04 |
| 4 | -1 | 0 | 0 | 1 | 257.3 | 0.57 | 60.01 |
| 5 | 0 | 0 | 1 | -1 | 249.4 | 0.259 | 49.9 |
| 6 | 0 | -1 | 0 | -1 | 275 | 0.29 | 56.44 |
| 7 | 0 | 1 | -1 | 0 | 243.4 | 0.36 | 48.8 |
| 8 | 1 | 0 | 0 | 1 | 228.2 | 0.31 | 76.3 |
| 9 | -1 | 0 | -1 | 0 | 250.4 | 0.561 | 41.44 |
| 10 | 0 | -1 | 0 | 1 | 260.9 | 0.41 | 51.3 |
| 11 | 0 | 0 | -1 | -1 | 247.4 | 0.265 | 47.33 |
| 12 | 1 | -1 | 0 | 0 | 281.3 | 0.252 | 52.9 |
| 13 | 1 | 0 | 0 | -1 | 293.3 | 0.26 | 61.33 |
| 14 | 0 | 1 | 0 | 1 | 256.3 | 0.38 | 69.56 |
| 15 | 0 | 0 | 0 | 0 | 190.4 | 0.24 | 70.8 |
| 16 | -1 | 1 | 0 | 0 | 244.5 | 0.552 | 49 |
| 17 | 0 | 1 | 0 | -1 | 286.6 | 0.262 | 34.5 |
| 18 | -1 | 0 | 0 | -1 | 240.8 | 0.49 | 46.2 |
| 19 | 0 | -1 | -1 | 0 | 249.9 | 0.38 | 52.3 |
| 20 | 0 | 0 | 0 | 0 | 176.3 | 0.258 | 61.4 |
| 21 | 0 | 0 | 0 | 0 | 174.98 | 0.25 | 79.3 |
| 22 | 1 | 1 | 0 | 0 | 300.9 | 0.38 | 68.89 |
| 23 | -1 | 0 | 1 | 0 | 196.3 | 0.604 | 56.2 |
| 24 | 1 | 0 | 1 | 0 | 286.6 | 0.34 | 57.88 |
| 25 | 0 | 0 | 1 | 1 | 237.3 | 0.41 | 68.2 |
| 26 | -1 | -1 | 0 | 0 | 286.5 | 0.611 | 50.66 |
| 27 | 0 | -1 | 1 | 0 | 256.3 | 0.351 | 43.98 |

**Table 4** The optimized SUNI-cubosomes formula is as follows

| **Sr.No** | **Name of the component** | **Weight(g)** |
| --- | --- | --- |
| **Step 1** | **Formula for liquid cubosomes** |  |
| 1 | GMO/PL 407 ratio(%w/w) | 100mg + 17.5 mg g |
| 2 | Drug Concentration | 0.525g |
| 3 | Homogenization pressure (Mpa) | 1033.09 mPa |
| 4 | Homogenization cycles(no) | 7.5 |
| 6 | Water | mL |
| 7 | Total volume | 50 mL |

Table 5 Stability results of suni-cubosomes

| **TEMPERATURE** | **DAY** | **SIZE (nm)** | **PDI** | **%EE** |
| --- | --- | --- | --- | --- |
| 4° C | 0 | 172.28± 3.43 | 0.241 ±0.004 | 71.46 ± 2.01 |
| 10 | 172.6 ± 3.71 | 0.240 ±0.006 | 71.44 ± 2.33 |
| 20 | 172.72 ± 3.80 | 0.245 ±0.009 | 71.41 ± 2.56 |
| 30 | 173.22± 4.31 | 0.246 ±0.013 | 71.40 ± 2.48 |
| 25° C | 0 | 172.28± 3.43 | 0.241 ±0.004 | 71.46 ± 2.01 |
| 10 | 172.38 ± 3.66 | 0.246±0.009 | 71.40 ± 2.49 |
| 20 | 173.6 ± 4.40 | 0.249 ±0.013 | 71.37 ± 3.27 |
| 30* | 175.35 ± 4.62 | 0.252±0.024 | 71.33 ± 3.16 |
| 40° C | 0 | 172.28± 3.43 | 0.241 ±0.004 | 71.46 ± 2.01 |
| 10 | 172.98± 3.91 | 0.244±0.008 | 71.0 ± 3.58 |
| 20 | 174.3± 5.43 | 0.251 ±0.011 | 70.25 ± 4.20 |
| 30* | 176.8± 4.48 | 0.258±0.015 | 69.22 ± 4.69 |

Note: (n=3, data represented as mean ± S.D) *Displayed statistical difference (p value <0.05) in comparison to day 0.

**Table 6** Pharmacokinetic parameters of SUNI plain drug, SUNI cubosomes

| **Pharmacokinetic parameters** | **SUNI pure drug** | **SUNI cubosomes** |
| --- | --- | --- |
| **C max (ng/mL)** | 1399.0 ±68.43 | 3944.89± 306.57 |
| **T max (h)** | 8 | 10 |
| **Half-life (h)** | 6.0017± 0.81 | 17.59± 1.80 |
| **AUC 0-t (ng. h/mL)** | 17113.73±150.14 | 89890.935± 506.11 |
| **AUC 0-inf (ng. h/mL)** | 18841.57± 391.52 | 105185.85± 518.19 |
| **AUMC 0-inf(ng. h/mL)** | 235749.54± 401.31 | 2774366.95±550.27 |
| **Ke (h-1)** | 0.115 | 0.0394 |
| **MRT** | 12.512 | 26.375 |
