# Supplementary material
Source: Research Square preprint supplement (doi:10.21203/rs.3.rs-9348532/v1)
Supplement: Supplementary file 2 [file 9bb5e3fd6244e2a9f7a2481a.docx]

**Supplementary tables:**

Supplementary **Tables 1** Anova Table with regard to quadratic model of Particle size, PDI and % EE

| **Response 1: Particle Size (PS)** | | | | | | |
| --- | --- | --- | --- | --- | --- | --- |
| **Source** | **Sum of Squares** | **df** | **Mean Square** | **F-value** | **p-value** |  |
| **Model** | 37921.41 | 14 | 2708.67 | 34.03 | < 0.0001 | significant |
| A-GMO/PL 407 ratio | 694.64 | 1 | 694.64 | 8.73 | 0.0120 |  |
| B-Drug Conc. | 0.4408 | 1 | 0.4408 | 0.0055 | 0.9419 |  |
| C-HP | 1996.92 | 1 | 1996.92 | 25.09 | 0.0003 |  |
| D-HC | 2505.63 | 1 | 2505.63 | 31.48 | 0.0001 |  |
| AB | 948.64 | 1 | 948.64 | 11.92 | 0.0048 |  |
| AC | 6715.80 | 1 | 6715.80 | 84.38 | < 0.0001 |  |
| AD | 1664.64 | 1 | 1664.64 | 20.91 | 0.0006 |  |
| BC | 170.30 | 1 | 170.30 | 2.14 | 0.1692 |  |
| BD | 65.61 | 1 | 65.61 | 0.8243 | 0.3818 |  |
| CD | 789.61 | 1 | 789.61 | 9.92 | 0.0084 |  |
| A² | 7526.36 | 1 | 7526.36 | 94.56 | < 0.0001 |  |
| B² | 18812.11 | 1 | 18812.11 | 236.35 | < 0.0001 |  |
| C² | 943.89 | 1 | 943.89 | 11.86 | 0.0049 |  |
| D² | 6040.25 | 1 | 6040.25 | 75.89 | < 0.0001 |  |
| **Residual** | 955.11 | 12 | 79.59 |  |  |  |
| Lack of Fit | 809.00 | 10 | 80.90 | 1.11 | 0.5640 | not significant |
| Pure Error | 146.11 | 2 | 73.05 |  |  |  |
| **Cor Total** | 38876.53 | 26 |  |  |  |  |
| **Response 2: PDI** | | | | | | |
| **Source** | **Sum of Squares** | **df** | **Mean Square** | **F-value** | **p-value** |  |
| **Model** | 0.3727 | 14 | 0.0266 | 24.87 | < 0.0001 | significant |
| A-GMO/PL 407 ratio | 0.1870 | 1 | 0.1870 | 174.71 | < 0.0001 |  |
| B-Drug Conc. | 0.0012 | 1 | 0.0012 | 1.12 | 0.3105 |  |
| C-HP | 0.0070 | 1 | 0.0070 | 6.55 | 0.0251 |  |
| D-HC | 0.0203 | 1 | 0.0203 | 19.00 | 0.0009 |  |
| AB | 0.0087 | 1 | 0.0087 | 8.17 | 0.0144 |  |
| AC | 0.0007 | 1 | 0.0007 | 0.6075 | 0.4508 |  |
| AD | 0.0002 | 1 | 0.0002 | 0.2102 | 0.6548 |  |
| BC | 0.0056 | 1 | 0.0056 | 5.19 | 0.0419 |  |
| BD | 1.000E-06 | 1 | 1.000E-06 | 0.0009 | 0.9761 |  |
| CD | 0.0077 | 1 | 0.0077 | 7.23 | 0.0197 |  |
| A² | 0.1119 | 1 | 0.1119 | 104.58 | < 0.0001 |  |
| B² | 0.0289 | 1 | 0.0289 | 27.01 | 0.0002 |  |
| C² | 0.0191 | 1 | 0.0191 | 17.86 | 0.0012 |  |
| D² | 0.0001 | 1 | 0.0001 | 0.0568 | 0.8157 |  |
| **Residual** | 0.0128 | 12 | 0.0011 |  |  |  |
| Lack of Fit | 0.0127 | 10 | 0.0013 | 15.59 | 0.0617 | not significant |
| Pure Error | 0.0002 | 2 | 0.0001 |  |  |  |
| **Cor Total** | 0.3855 | 26 |  |  |  |  |
| **Response 3: %EE** | | | | | | |
| **Source** | **Sum of Squares** | **df** | **Mean Square** | **F-value** | **p-value** |  |
| **Model** | 2862.96 | 14 | 204.50 | 8.92 | 0.0003 | significant |
| A-GMO/PL 407 ratio | 571.73 | 1 | 571.73 | 24.95 | 0.0003 |  |
| B-Drug Conc. | 52.29 | 1 | 52.29 | 2.28 | 0.1568 |  |
| C-HP | 55.90 | 1 | 55.90 | 2.44 | 0.1443 |  |
| D-HC | 572.70 | 1 | 572.70 | 24.99 | 0.0003 |  |
| AB | 77.88 | 1 | 77.88 | 3.40 | 0.0901 |  |
| AC | 167.96 | 1 | 167.96 | 7.33 | 0.0190 |  |
| AD | 0.3364 | 1 | 0.3364 | 0.0147 | 0.9056 |  |
| BC | 114.49 | 1 | 114.49 | 5.00 | 0.0452 |  |
| BD | 404.01 | 1 | 404.01 | 17.63 | 0.0012 |  |
| CD | 38.44 | 1 | 38.44 | 1.68 | 0.2196 |  |
| A² | 99.61 | 1 | 99.61 | 4.35 | 0.0591 |  |
| B² | 590.99 | 1 | 590.99 | 25.79 | 0.0003 |  |
| C² | 459.34 | 1 | 459.34 | 20.05 | 0.0008 |  |
| D² | 209.36 | 1 | 209.36 | 9.14 | 0.0106 |  |
| **Residual** | 274.98 | 12 | 22.91 |  |  |  |
| Lack of Fit | 114.64 | 10 | 11.46 | 0.1430 | 0.9874 | not significant |
| Pure Error | 160.34 | 2 | 80.17 |  |  |  |
| **Cor Total** | 3137.94 | 26 |  |  |  |  |

**Supplementary Table 2** Data of variables w.r.t factors F value and R2

| Factors | F-value (model) | P-value | Lack of fit | R2 | Adjusted R2 | Predicted R2 | Adeq Precision |
| --- | --- | --- | --- | --- | --- | --- | --- |
| PS | 34.03 | 0.0500 | 1.11 | 0.9754 | 0.9468 | 0.8717 | 18.0119 |
| PDI | 24.87 | 0.0500 | 15.59 | 0.9667 | 0.9278 | 0.8096 | 16.0068 |
| %EE | 8.92 | 0.0500 | 0.14 | 0.9124 | 0.8101 | 0.6746 | 9.8590 |
